# Supplementary material
Source: publisher figshare collection journal article supplement (https://acs.figshare.com/ndownloader/files/4062676)
Supplement: Supplementary file 1 [file 4062676]

# Supporting Information for Publication

## Theoretical Analysis on the Optoelectronic Properties of Single Crystals of Thiophene-Furan-Phenylene Co-oligomers: Efficient Photoluminescence due to Molecular Bending

Hiroyuki Tamura, Ikutaro Hamada, Hui Shang, Kazuaki Oniwa, Md. Akhtaruzzaman, Tienan Jin, Naoki Asao, Yoshinori Yamamoto, Kanagasekaran Thangavel, Hidekazu Shimotani, Susumu Ikeda, and Katsumi Tanigaki

WPI Advanced Institute for Materials Research (WPI-AIMR), Tohoku University, 2-2-1 Katahira, Aoba-ku, Sendai 980-8577, Japan

Experimental emission maxima,  $\lambda$ , and quantum yield,  $\Phi$ , of BP2T and BPFT single crystals.

|      | $\lambda$ (nm) | $\Phi$ (%) |
|------|----------------|------------|
| BP2T | 587            | 38         |
| BPFT | 549            | 51         |

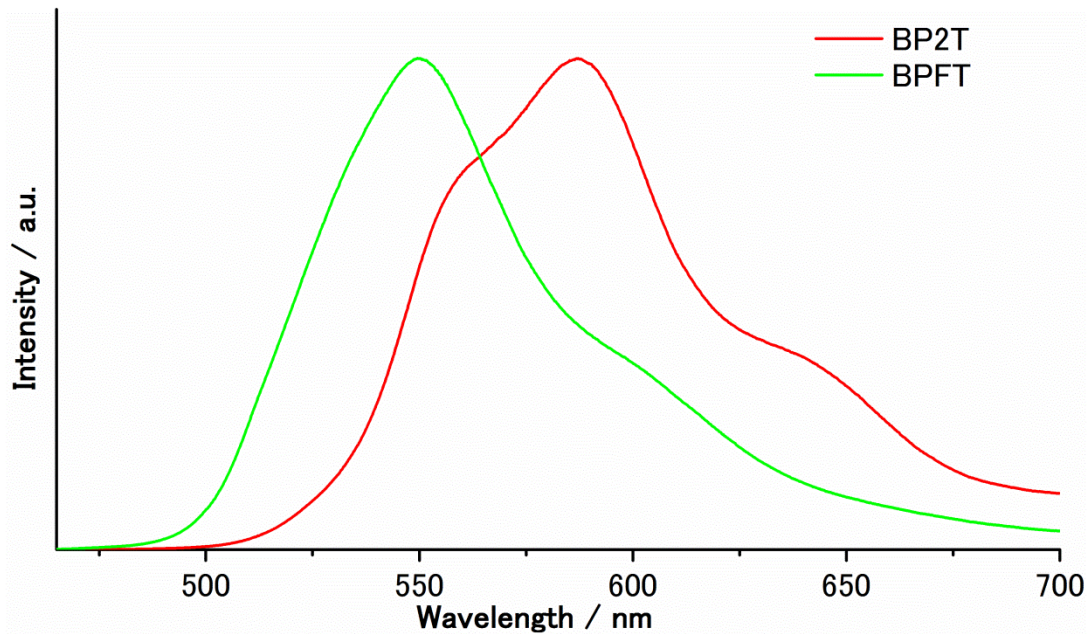

Photoluminescence spectra of BP2T and BPFT single crystals, where the intensity is normalized.

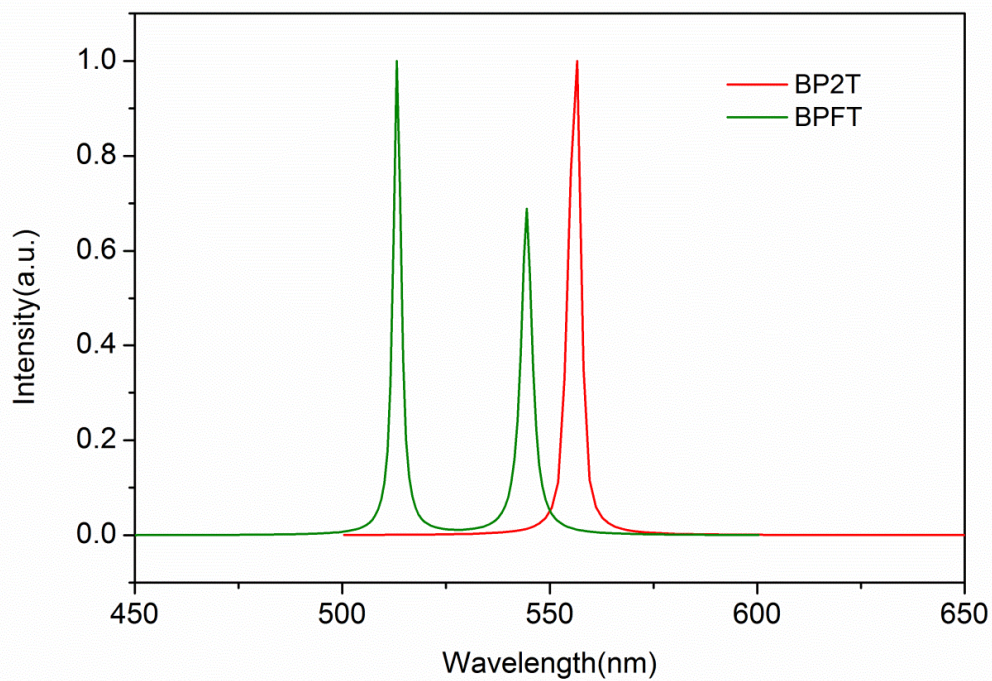

Amplified spontaneous emission (ASE) spectra of BP2T and BPFT single crystals. Although the intensity is normalized, the peaks of BPFT are generally stronger than that of BP2T.
